# Supplementary material for: Origins and Function of VL30 lncRNA Packaging in Small Extracellular Vesicles: Implications for Cellular Physiology and Pathology
Source: MDPI journal article supplement (doi:10.3390/biomedicines9111742), 2021-11-22
Supplement: s1 [file s1]

## Supplementary Figures

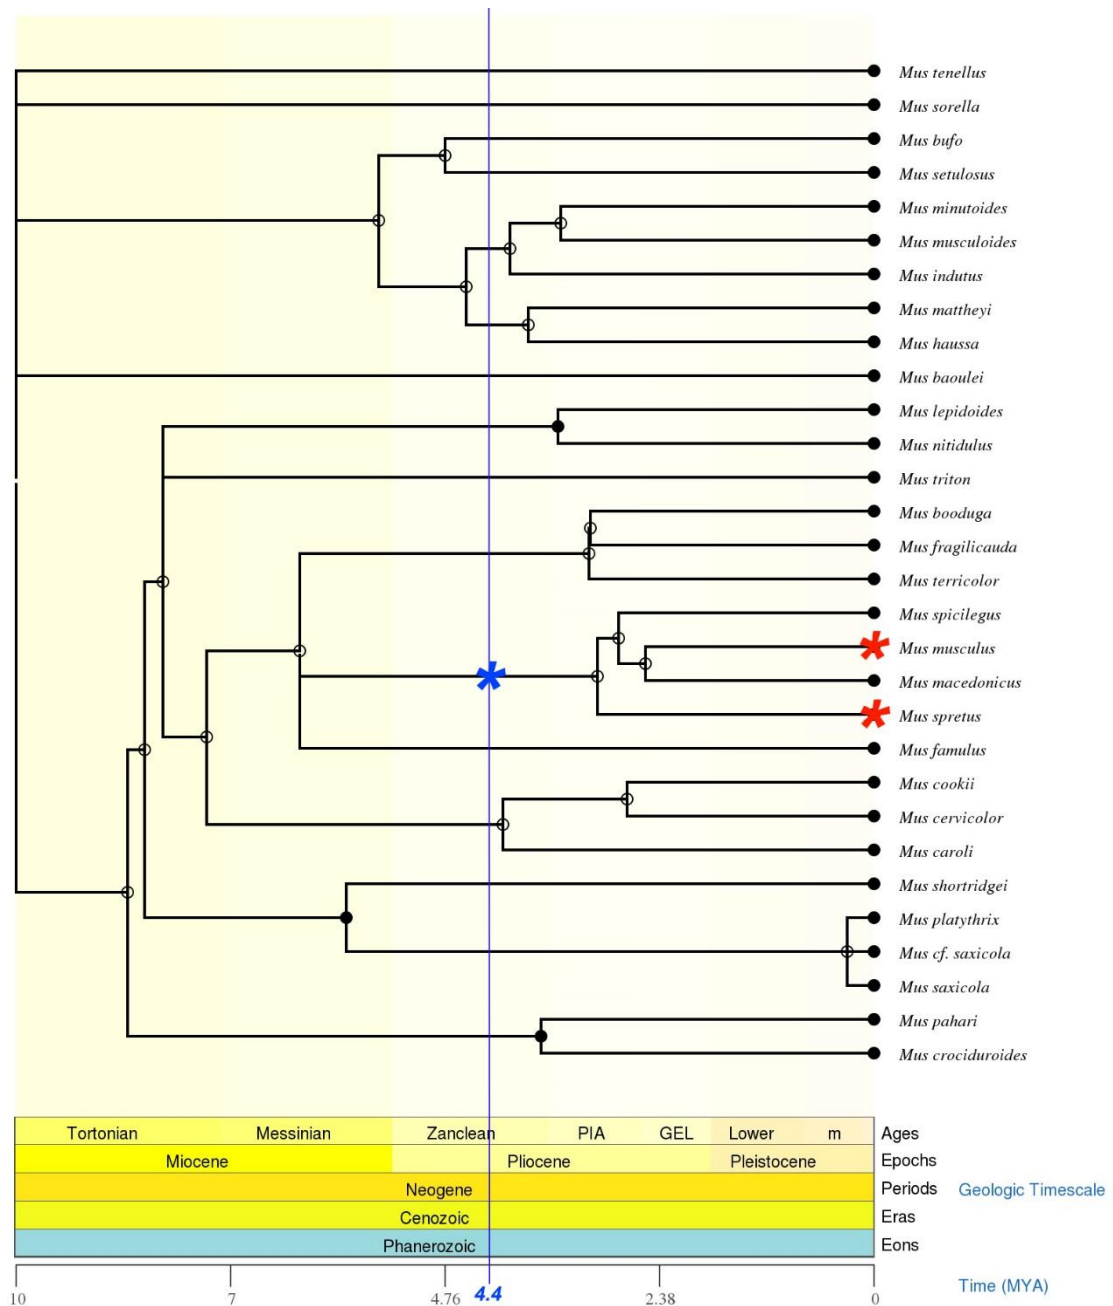

**Figure S1:** SEV-VL30s in the phylogenetic tree of the *Mus* genus. The two *mus* species containing SEV-motifs are indicated with red asterisk. Blue asterisk denotes the inferred evolutionary time of SEV-motif occurrence of 4.4 million years ago (MYA), which is also indicated in the timeline with blue vertical line.

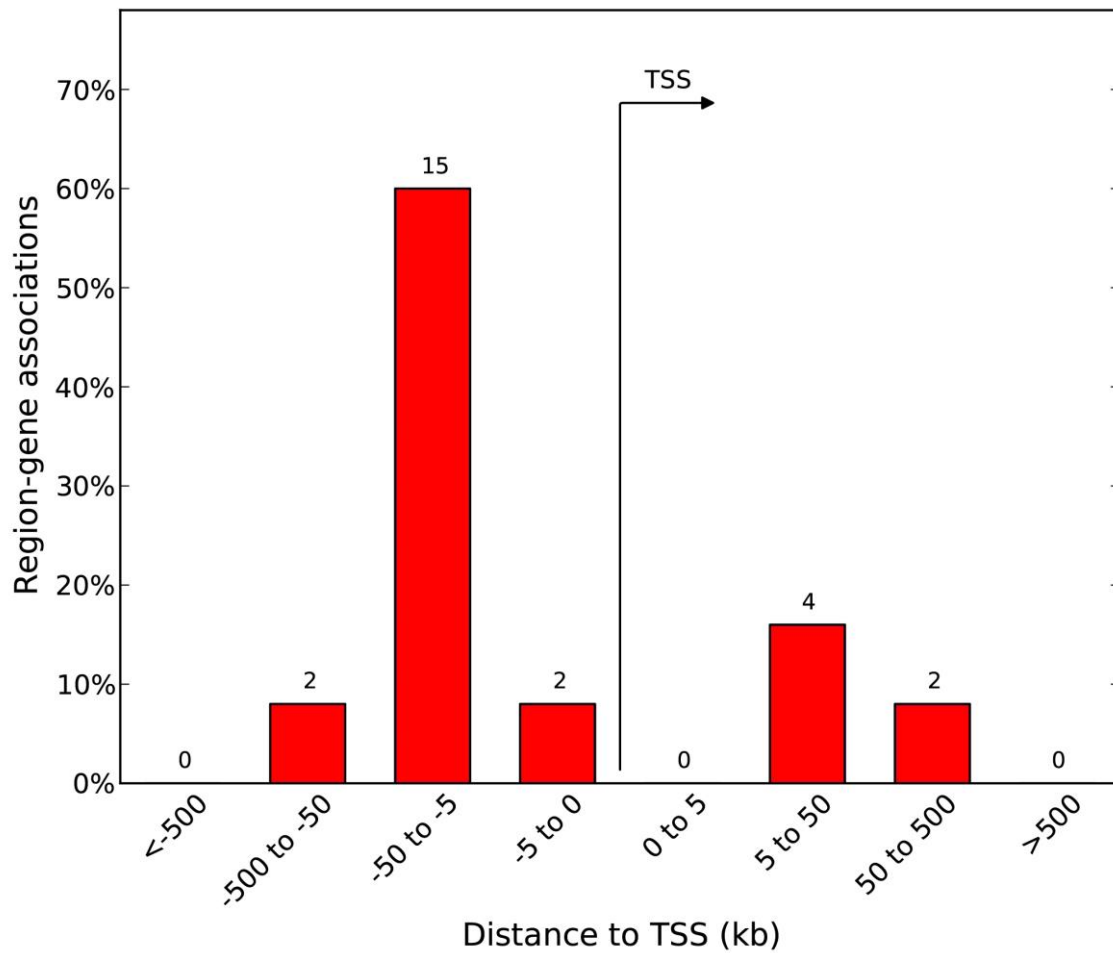

**Figure S2:** Distance of SEV-VL30s to mouse genes promoters. The distance between SEV-VL30s, associated to cCREs and mouse Transcription Start Sites (TSS) was calculated following GREAT analysis. The percentage and number of SEV-VL30s in different distances to Transcription Start Sites (TSS) is shown. Relative distance to TSS is divided into 0-5, 5-50, 50-500 and >500 kb.

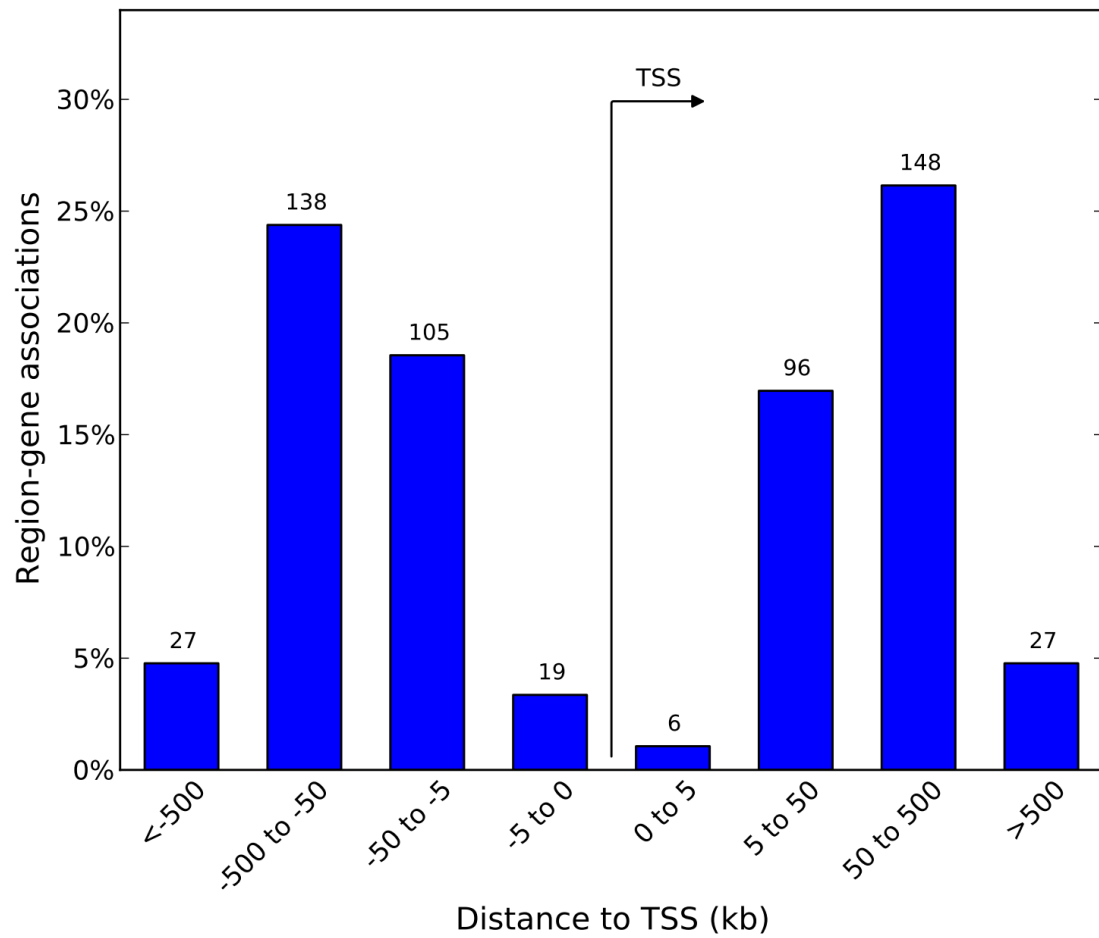

**Figure S3:** Distance of VL30 elements not associated with SEVs (non-SEV VL30s) to mouse genes promoters, following GREAT analysis. The percentage and number of SEV-VL30s in different distances to Transcription Start Sites (TSS) is shown. Relative distance to TSS is divided into 0-5, 5-50, 50-500 and >500 kb.

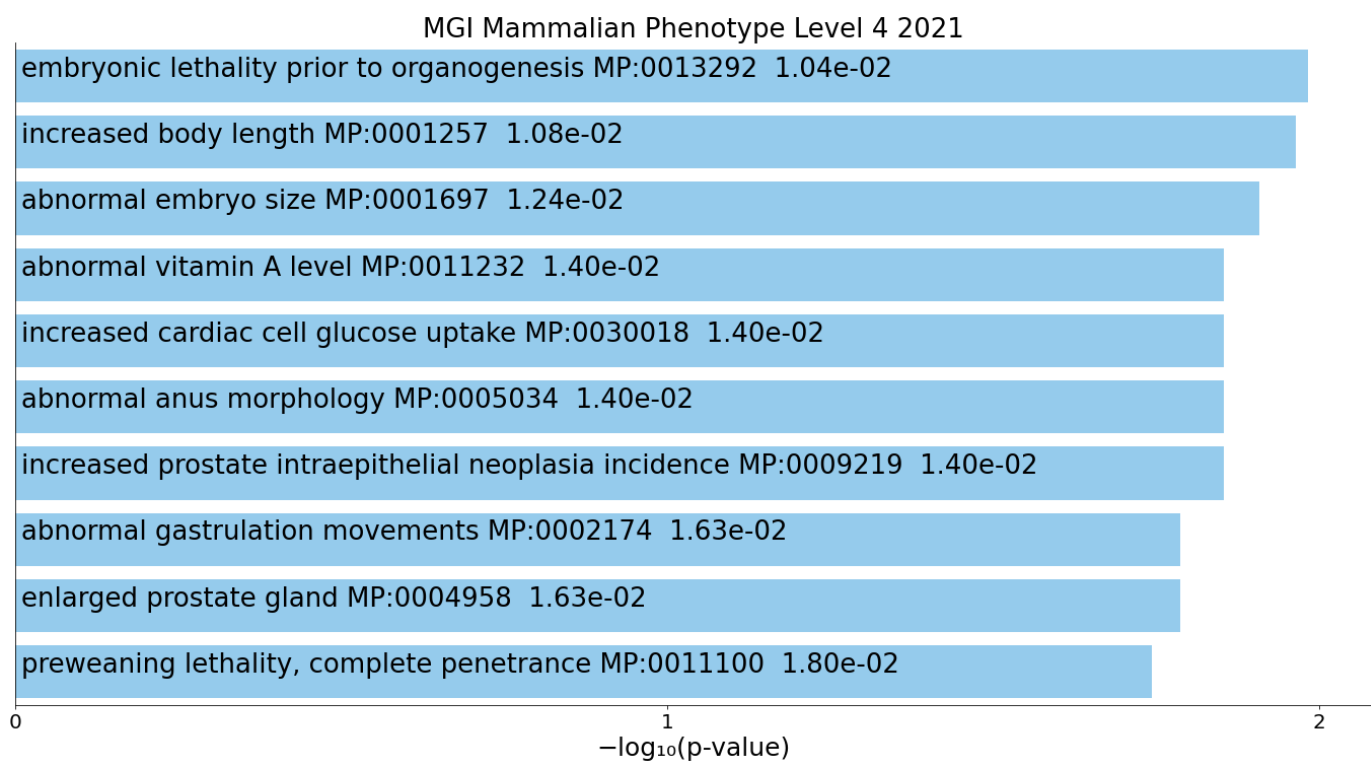

**Figure S4:** Enrichment for mammalian phenotypes in genes related to SEV-VL30s. Following Enrichr analysis, the top-10 phenotypes containing SEV-VL30s related genes were plotted, based on significance p-value.

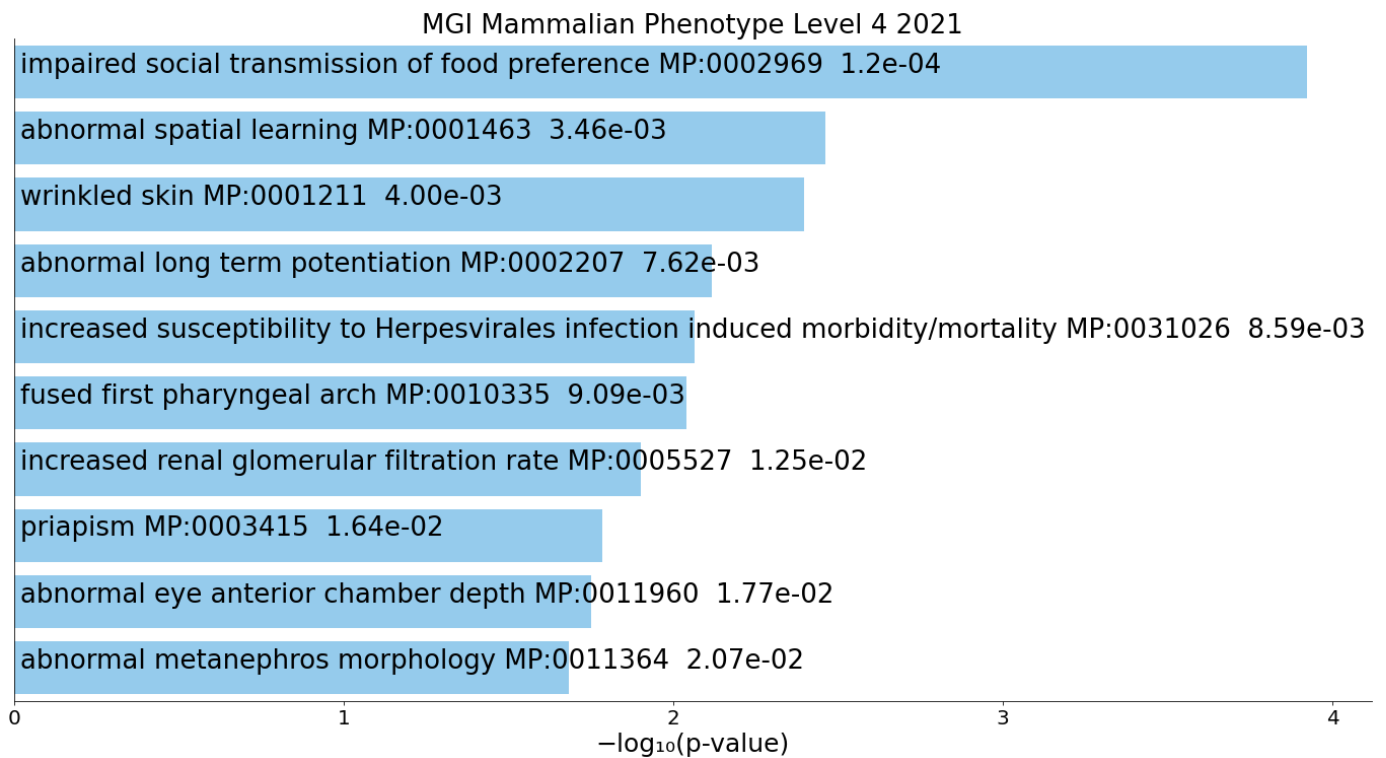

**Figure S5:** Enrichment for mammalian phenotypes in genes related to non-SEV VL30s. Following Enrichr analysis, the top-10 phenotypes containing non-SEV VL30s related genes were plotted, based on significance p-value.
