# Supplementary material for: Origins and Function of VL30 lncRNA Packaging in Small Extracellular Vesicles: Implications for Cellular Physiology and Pathology
Source: Biomedicines. 2021 Nov 22;9(11):1742. doi: 10.3390/biomedicines9111742 (PMC8615591; doi:10.3390/biomedicines9111742)
Supplement: Supplementary file 1 [file biomedicines-09-01742-s001.zip › Table S1.xls]

## Sheet: SEV-VL30s
Name	chromosome	start*	end*	Strand	Total Length	5' LTR Length	5' LTR Type	3' LTR Length	3' LTR Type	PBS Type	PBS seq	PPT seq	TSD	SFPQ-BM1	SFPQ-BM2
1qA2	chr1	9235030	9240388	+	5358	639	RLTR6_Mm	639	RLTR6_Mm	GlyGCC	TGCATTGGCCGGGAAACA	AGAAGAAGTGGGGAA	AAGT	100	100
1qA5	chr1	25014825	25019743	+	4918	524	RLTR6_Mm	524	RLTR6_Mm	GlyGCC	TGCATTGGCCGGGAAACA	AGAAGAAGTGGGGAA	GCAT	95	93
1qD	chr1	87075394	87080790	-	5396	595	RLTR6_Mm	595	RLTR6_Mm	GlyTCC	TGCGTTGGCCGGGAA	AGAAGAAGTGGGGAA	GTAC	100	100
2qC3tr	chr2	75638103	75642945	+	4842		RLTR6_Mm		RLTR6_Mm					100	100
2qD-2	chr2	81988848	81993768	+	4920	436	RLTR6C_Mm	440	RLTR6C_Mm	MetCAT	GCAAAGGTGTATGAGTTTCG	AGAAGAAGTGGGGAA	-	100	93
2qH4	chr2	177250920	177256413	+	5493	649	RLTR6_Mm	649	RLTR6_Mm	GlyGCC	TGCATTGGCCGGGAAACA	AGAAGAAGTGGGGAA	TCAT	95	100
4qA1	chr4	8392626	8398117	+	5491	631	RLTR6_Mm	631	RLTR6_Mm	GlyGCC	TGCATTGGCCGGGAAACA	AGAAGAAGTGGGGAA	CTCT	100	100
4qB3tr	chr4	55418208	55423210	+	5002		RLTR6_Mm		RLTR6_Mm					100	100
4qE1-2	chr4	146936829	146941512	+	4683	558	RLTR6_Mm	558	RLTR6_Mm	GlyGCC	TGCATTGGCCGGGAAACA	AGAAGAAGTGGGGAA	GTAG	100	100
4qE2	chr4	149433980	149439197	-	5217	600	RLTR6_Mm	600	RLTR6_Mm	GlyGCC	TGCATTGGCCGGGAAACA	AGAAGAAGTGGGGAA	CTAC	100	100
5qE3	chr5	94516084	94521511	+	5427	657	RLTR6_Mm	657	RLTR6_Mm	GlyGCC	TGCATTGGCCGGGAATCA	AGAAGAAGTGGGGAA	GTAG	100	100
5qG2	chr5	135623626	135628983	+	5357	625	RLTR6_Mm	625	RLTR6_Mm	GlyGCC	TGCATTGGCCGGGAAACA	AGAAGAAGTGGGGAA	TGGG	100	100
6qG2	chr6	142167390	142172789	+	5399	681	RLTR6_Mm	681	RLTR6_Mm	GlyTCC	TGCGTTGGCCGGGAA	AGAAGAAGTGGGGAA	GCTC	100	100
7qA3	chr7	22772826	22778174	+	5348	593	RLTR6_Mm	593	RLTR6_Mm	GlyGCC	TGCATTGGCCGGGAA	AGAAGAAGTGGGGAA	GAAG	100	100
8qA4	chr8	33713744	33718740	+	4996	496	RLTR6_Mm	496	RLTR6_Mm	GlyTCC	TGCGTTGGCCGGGAA	AGAAGAAGTGGGGAA	ATTA	100	100
8qC3	chr8	85137210	85142219	-	5009	495	RLTR6_Mm	495	RLTR6_Mm	GlyGCC	TGCATTGGCCGGGAAACA	AGAAGAAGTGGGGAA	ATAG	95	90
8qD3	chr8	106676275	106681715	+	5440	605	RLTR6_Mm	606	RLTR6_Mm	GlyTCC	TGCGTTGGCCGGGAA	AGAAGAAGTGGGGAA	CCAT	100	100
11qA1	chr11	5552742	5558119	-	5377	602	RLTR6_Mm	602	RLTR6_Mm	GlyGCC	TGCATTGGCCGGGAAACA	AGAAGAAGTGGGGAA	ACCT	100	100
11qC	chr11	86811742	86816395	-	4653	499	RLTR6C_Mm	499	RLTR6C_Mm	GlyTCC	TGCGTTGGCCGGGAA	AGAAGAAGTGGGGAA	GTTT	100	100
12qA1-3	chr12	24080507	24085642	-	5135	611	RLTR6B_Mm	611	RLTR6B_Mm	GlyTCC	TGCGTTGGCCGGGAA	AGAAGAAGTGGGGAA	GTTG	100	100
12qA1-3-2	chr12	23021842	23027042	+	5200	581	RLTR6B_Mm	581	RLTR6B_Mm	GlyCCC|GlyGCC	TGCATTGGCCGGGAATTCG	AGAAGAAGTGGGGAA	ATCC	100	100
12qC1	chr12	59222623	59227139	+	4516	599	RLTR6_Mm	599	RLTR6_Mm	GlyGCC	TGCATTGGCCGGGAAACA	AGAAGAAGTGGGGAA	CTGT	NO	NO
13qA1	chr13	14020213	14025066	+	4853	602	RLTR6_Mm	602	RLTR6_Mm	GlyGCC	TGCATTGGCCGGGAAACA	AGAAGAAGTGGGGAA	GTTC	100	100
13qA3-1	chr13	21762795	21768190	-	5395	600	RLTR6_Mm	600	RLTR6_Mm	GlyGCC	TGCATTGGCCGGGAAACA	AGAAGAAGTGGGGAA	GTGT	100	100
13qA5	chr13	51633934	51639067	-	5133	537	RLTR6_Mm	534	RLTR6_Mm	GlyGCC	TGCATTGGCCGGGAAACA	AGAAGAAGTGGGGAA	CTGG	100	100
13qB1	chr13	55184447	55189240	+	4793	558	RLTR6_Mm	558	RLTR6_Mm	GlyTCC	TGCGTTGGCCGGGAA	AGAAGAAGTGGGGAA	CAGG	100	100
13qB3.2tr	chr13	68089871	68103770	+	13899		RLTR6B_Mm		RLTR6B_Mm					100	100
13qB3-6	chr13	68296096	68301161	+	5065	536	RLTR6_Mm	535	RLTR6_Mm	GlyTCC	TGCGTTGGCCGGGAATC	AGAAGAAGTGGGGAA	ACGT	100	100
13qB3-7	chr13	62291682	62296908	-	5226	625	RLTR6_Mm	625	RLTR6_Mm	GlyGCC	TGCATTGGCCGGGAAACA	AGAAGAAGTGGGGAA	GTAG	100	100
13qB3tr	chr13	62082080	62093618	-	11538		RLTR6_Mm		RLTR6_Mm					100	96
14qB	chr14	32115304	32120545	+	5241	577	RLTR6_Mm	577	RLTR6_Mm	GlyGCC	TGCATTGGCCGGGAAACA	AGAAGAAGTGGGGAA	ATAT	100	100
15qE1	chr15	82362535	82368002	+	5467	646	RLTR6_Mm	646	RLTR6_Mm	GlyGCC	TGCATTGGCCGGGAAACA	AGAAGAAGTGGGGAA	ATAG	100	100
18qA1	chr18	6663828	6669137	-	5309	588	RLTR6_Mm	588	RLTR6_Mm	GlyGCC	TGCATTGGCCGGGAAACA	AGAAGAAGTGGGGAA	GACC	100	100
18qE4	chr18	89835529	89840570	+	5041	534	RLTR6_Mm	534	RLTR6_Mm	GlyGCC	TGCATTGGCCGGGAAACA	AGAAGAAGTGGGGAA	CAGA	100	93
19qA2	chr19	4061381	4066369	-	4988	534	RLTR6_Mm	534	RLTR6_Mm	GlyGCC	TGCATTGGCCGGGAAACA	AGAAGAAGTGGGGAA	GTTT	100	100
19qA3	chr19	3223703	3228796	-	5093	562	RLTR6_Mm	562	RLTR6_Mm	GlyGCC	TGCATTGGCCGGGAAACA	AGAAGAAGTGGGGAA	CTAG	100	100
XqA3-1	chrX	33841331	33846719	-	5388	588	RLTR6_Mm	588	RLTR6_Mm	GlyGCC	TGCATTGGCCGGGAAACA	AGAAGAAGTGGGGAA	ATAT	100	80
XqE3-2	chrX	125102110	125107539	+	5429	539	RLTR6_Mm	539	RLTR6_Mm	GlyGCC	TGCATTGGCCGGGAATCA	AGAAGAAGTGGGGAA	AGGC	100	93
XqF3	chrX	150485030	150489968	+	4938	589	RLTR6_Mm	589	RLTR6_Mm	GlyGCC	TGCATTGGCCGGGAAACA	AGAAGAAGTGGGGAA	ACTA	100	100
YqB	chrY	40026617	40031829	-	5212	540	RLTR6_Mm	540	RLTR6_Mm	GlyTCC	TGCGTTGGCCGGGAA	AGAAGAAGTGGGGAA	TCTT	100	100

## Sheet: Legend-Abbreviations
Legend:	Structural features of SEV-VL30s
Abbreviations:
LTR	Long Terminal Repeat
PBS	Primer Binding site
PPT	Polypurine tract
SFPQ-BM	SFPQ binding motif
